# Supplementary material
Source: publisher site journal article supplement (https://www.spandidos-publications.com/1358/downloadSupplementary)
Supplement: Supplementary file 1 [file downloadSupplementary]

Figure S1. VL30 retrotransposition frequency values in C127 and J3B1A cells. (A and B) Samples of 15,000 cells from single and massive (Mass.) C127 or J3B1A clone cells were measured for EGFP positivity with FACS using respective normal cells. Columns represent the mean value of net retrotransposition frequencies (calculated as in Fig. 1A) of duplicate samples from three independent experiments with  $\pm$ SD indicated with bars. There was no statistically significant difference (n.s.) between retrotransposition frequencies of C127 clones 3, 4, 8, 13, as well as 5 and 6 clones. In the remaining clones, multiple comparisons in pairs (Tukey's post hoc test after ANOVA) revealed a statistically significant difference at  $P < 0.05$ . Similarly, in the retrotransposition frequencies of J3B1A clones 1, 10, 13, as well as clones 8, 9 there was no statistically significant difference. In all other relative clones, multiple comparisons in pairs (Tukey's post hoc test after ANOVA) revealed a statistically significant difference at  $P < 0.05$ .

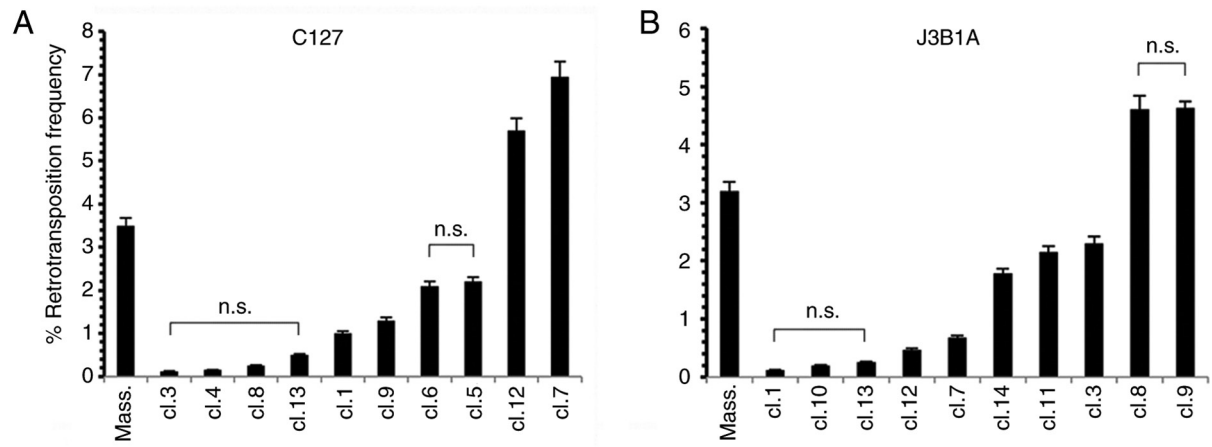

Figure S2. VL30 retrotransposition has no effect on the epithelial phenotype of C127 cells. Control C127 and C127-retrotransposition positive clone 7 cells, respectively, were grown in normal culture dishes and photographed under normal light (magnification, x20).

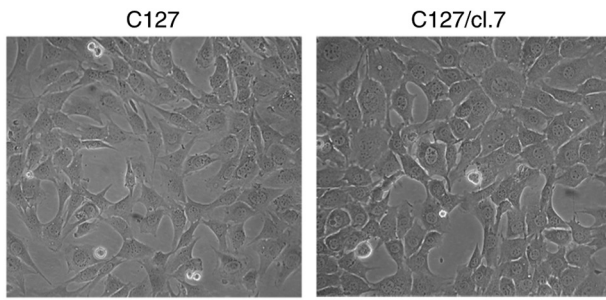

Figure S3. EGFP-N1/G418-resistant HC11 cells retain their epithelial phenotype. Control HC11 and massive EGFP-N1/G418-resistant HC11 clone cells, grown in normal culture dishes, were photographed under normal light (magnification, x20).

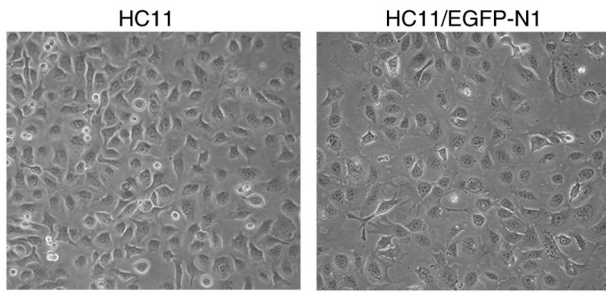

Figure S4. Target sequencing analysis of clone 7 and clone 19 DNAs. (A) Basic structure of the NVL-3\*/EGFP-INT VL30 recombinant element. 5' and 3' LTRs are shown with black blocks. Green blocks are parts of sequences of the EGFP gene interrupted by a  $\gamma$ -globin intron shown with a yellow block. Light blue block corresponds to sequences of the human cytomegalovirus immediate-early (CMV-IE) promoter. Block arrowheads show transcriptional orientations. (B) Schematic mapped reads corresponding to both 3'LTR and extending genomic sequences obtained after sequencing of clone 7 (cl.7) and clone 19 (cl.19) DNAs. Both-side arrowhead shows '3 LTR sequences.

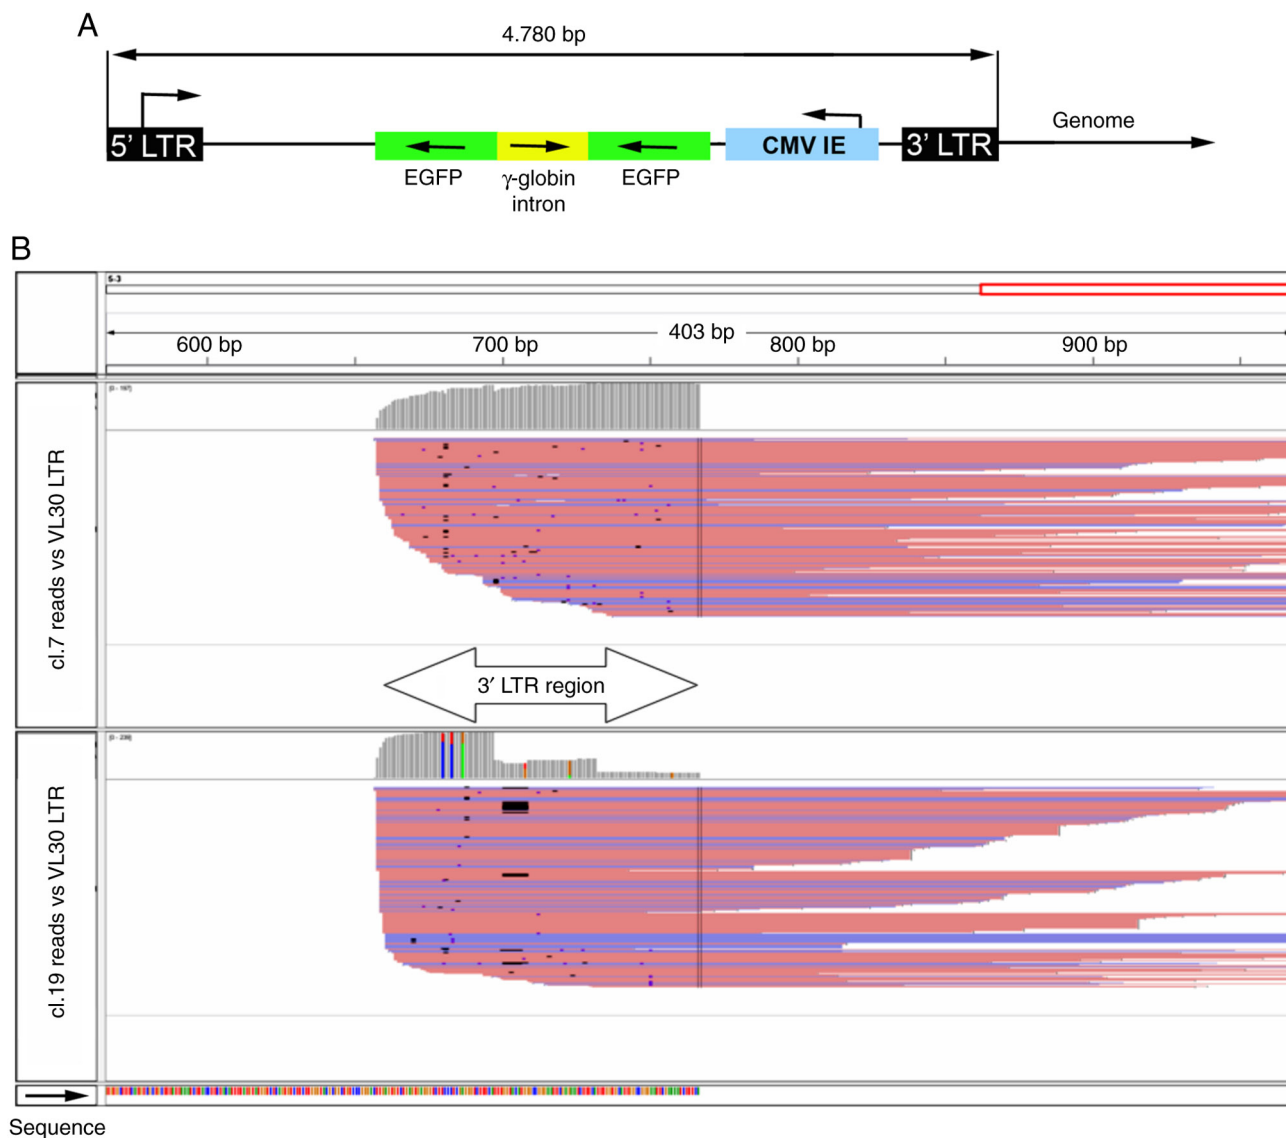

Figure S5. Comparison of mRNA expression of VL30 elements and enRTs genes in NIH3T3 fibroblasts and HC11 cells. Total RNA isolated from NIH3T3 or HC11 cells was reverse transcribed and subjected to RT-qPCR analysis (for primers please see Materials and methods). Indicated grey and blue columns represent mRNA expression levels, after control GAPDH cDNA template normalization, as mean values of duplicate samples from three independent experiments with  $\pm$ SD indicated with bars. P1 and P2 correspond to statistically significance values of 0.0045 and 0.0134, respectively (paired sampler Student's t-test).

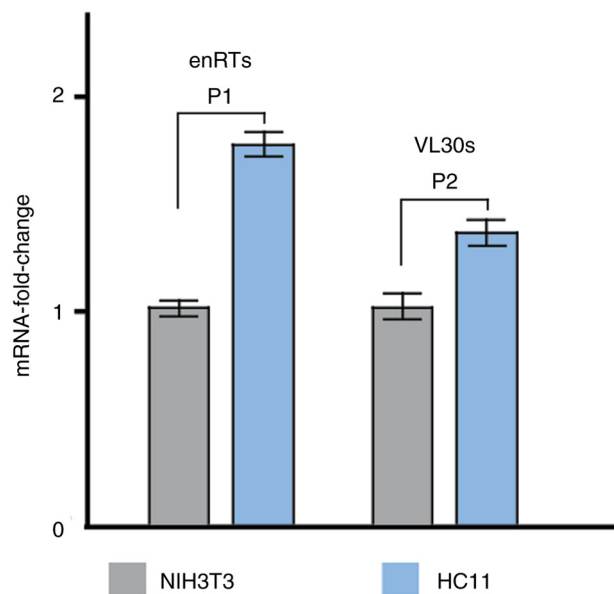

Table SI. High-confidence new VL30 integrations in HC11 clone cells.

| Gene name             | Distance to<br>gene/chromosome<br>no. | Function, disease and cancer type                                                                      | (Refs.)                                                                  |
|-----------------------|---------------------------------------|--------------------------------------------------------------------------------------------------------|--------------------------------------------------------------------------|
| Clone 19 integrations |                                       |                                                                                                        |                                                                          |
| <i>Accb1a</i>         | +94142/17                             | Low expression involved in colorectal cancer                                                           | (1)                                                                      |
| <i>Ahctf1</i>         | -130748/1                             | Related to cancer through histone LSD1 demethylase                                                     | (2,3)                                                                    |
| <i>Calm2</i>          | -154014/17                            | Prognostic biomarker for gastric cancer                                                                | (4)                                                                      |
| <i>Cd38</i>           | +42731/5                              | Suppression of the immune system in <u>breast cancer</u>                                               | (5)                                                                      |
| <i>Cdc42bpa</i>       | -26157/1                              | Regulated by miR-515-5p in <u>breast cancer</u>                                                        | (6)                                                                      |
| <i>Dgke</i>           | +22081/11                             | Silenced in non-adherent HT-29 colon cancer cells                                                      | (7)                                                                      |
| <i>Eif2ak1</i>        | -35707/5                              | Inhibitor kinase responding to heme deprivation                                                        | (8)                                                                      |
| <i>Epcam</i>          | -35030/17                             | Linked with Lynch syndrome (retrotransposon Alu)                                                       | (9)                                                                      |
|                       |                                       | CSCs marker in solid cancers including <u>breast cancer</u>                                            | (10)                                                                     |
| <i>Fbxo33</i>         | -7540/12                              | Involved in cancer development & progression & EMT                                                     | (11)                                                                     |
| <i>Fgfbp1</i>         | +70222/5                              | Associated with several types of cancer including pancreatic and colorectal adenocarcinomas            | (12)                                                                     |
| Ganab                 | +932/19                               | Associated with polycystic kidney and liver disease                                                    | (13)                                                                     |
| Gm3604                | +86570/13                             | Unknown function                                                                                       | -                                                                        |
| Gm6614                | -161544/6                             | Unknown function                                                                                       | -                                                                        |
| <i>Gspt2</i>          | -15268/X                              | Related to translational control in <u>mammary tumors</u>                                              | (14)                                                                     |
|                       |                                       | Hypothesis: Generated by retrotransposition of GPT1's RNA                                              | (15)                                                                     |
| <i>Maged1</i>         | -78658/X                              | Down-regulated in <u>breast carcinoma cell lines</u>                                                   | (16)                                                                     |
| <i>Ndufa6</i>         | -4910/15                              | Down-regulated in response to drugs in rheumatoid arthritis                                            | (17)                                                                     |
| <i>Pbx1</i>           | -169721/1                             | Regulates EGF-ER $\alpha$ genes expressed in <u>aggressive breast tumors</u>                           | (18)                                                                     |
| <i>Rbm12b1</i>        | -7309/4                               | Unknown to be linked with disease                                                                      | OMIM database<br><a href="https://www.omim.org">https://www.omim.org</a> |
| <i>Rbm12b2</i>        | +43567/4                              | Unknown to be linked with disease                                                                      | OMIM database<br><a href="https://www.omim.org">https://www.omim.org</a> |
| <i>Slco1a6</i>        | +13195/6                              | Broadly affects gene expression in mouse pancreatic islets                                             | (19)                                                                     |
| <i>Trim25</i>         | +45393/11                             | Overexpressed in <u>breast and ovarian cancer</u>                                                      | (20,21)                                                                  |
| <i>Try4</i>           | -105197/6                             | A maturation marker in pancreas                                                                        | (22)                                                                     |
| <i>Usp42</i>          | -49801/5                              | Involved in modulation of transcription                                                                | (23)                                                                     |
|                       |                                       | Stabilizes p53 in response to stress                                                                   | (24)                                                                     |
| <i>Zfp808</i>         | +135344/13                            | Zinc finger proteins are related to <i>Epithelial to mesenchymal transition and cancer progression</i> | (25)                                                                     |
| Clone 7 integrations  |                                       |                                                                                                        |                                                                          |
| <i>Aarsd1</i>         | +10804/11                             | Co-chaperone, required for muscle differentiation                                                      | (26)                                                                     |
| <i>Abcf2</i>          | +3545/5                               | Related to chemo-resistance in <u>breast cancer</u>                                                    | (27)                                                                     |
| <i>Akap2</i>          | -65048/4                              | Required for regulation of $\beta$ -catenin/Wnt signaling                                              | (28)                                                                     |
| <i>Asb14</i>          | -140846/14                            | Related to metabolic syndrome                                                                          | (29)                                                                     |
| <i>Col5a1</i>         | +109009/2                             | Might be a key gene for <u>human breast cancer</u>                                                     | (30)                                                                     |
| <i>Dnahc12</i>        | +60437/14                             | Unknown to be linked with disease                                                                      | OMIM database<br><a href="https://www.omim.org">https://www.omim.org</a> |
| <i>Fam49a</i>         | +222800/12                            | Modulates the PTEN pathway                                                                             | (31)                                                                     |
|                       |                                       | The PTEN/Akt/mTOR pathway is <u>involved in breast cancer</u>                                          | (32)                                                                     |
| <i>Fcnb</i>           | +89451/2                              | Marks apoptotic & necrotic cell death                                                                  | (33)                                                                     |
| <i>G6pc</i>           | +39250/11                             | Glucose metabolism and cell cycle control in <i>ovarian cancer</i>                                     | (34)                                                                     |
| <i>Gm13151</i>        | -692/4                                | Zinc finger proteins are related to <i>Epithelial to mesenchymal transition and cancer progression</i> | (25)                                                                     |
| <i>Gm20459</i>        | +151288/4                             | Links the Palm2 and Akap2 anchor protein 2 genes                                                       | OMIM database<br><a href="https://www.omim.org">https://www.omim.org</a> |
| <i>Gpr68</i>          | +104086/12                            | Mediates interaction of <i>cancer fibroblasts and cancer cells</i>                                     | (35)                                                                     |
| <i>Pet2</i>           | +398507/X                             | Not related to disease                                                                                 | OMIM database<br><a href="https://www.omim.org">https://www.omim.org</a> |
| <i>Rpl36-ps3</i>      | -427047/12                            | Pseudogene 3                                                                                           | OMIM database<br><a href="https://www.omim.org">https://www.omim.org</a> |

Table SI. Continued.

| Gene name       | Distance to<br>gene/chromosome<br>no. | Function, disease and cancer type                                           | (Refs.) |
|-----------------|---------------------------------------|-----------------------------------------------------------------------------|---------|
| <i>Slc28a1</i>  | -29880/7                              | Associates with prognosis of <i>pancreatic cancer</i>                       | (36)    |
| <u>Il1rapl1</u> | -895537/X                             | Lower expression in <u>breast cancer cell lines and primary tumors</u>      | (37)    |
| <i>Rragc</i>    | +376884/4                             | Regulates the mammalian target rapamycin complex 1 (mTORC1)                 | (38)    |
| <u>Rragc</u>    |                                       | mTORC1/RRAGC mutations are related with <i>follicular lymphoma</i>          | (39)    |
|                 |                                       | Activated AKT-mTOR signaling is involved in <u>breast cancer metastasis</u> | (40)    |
|                 |                                       | mTOR activation drives <i>epithelial to mesenchymal transition</i>          | (41)    |

New VL30 genomic integrations of clones 19 and 7. The list shows horizontally the name of a gene accompanied by: Its molecular distance from the nearest new VL30 integration, chromosome number of integration, as well as gene property, function, and related disease/non-disease or cancer type. Symbols (-) or (+) denote integrations upstream or downstream of genes, respectively. Genes involved in various types of cancer are presented in italics, while those in breast cancer are underlined. The numbered references of the genes are presented in the Reference list.

## References

- Andersen V, Vogel U, Godiksen S, Frenzel FB, Sæbø M, Hamfjord J, Kure E and Vogel LK: Low ABCB1 gene expression is an early event in colorectal carcinogenesis. *PLoS One* 8: e72119, 2013.
- Amente S, Lania L and Majello B: The histone LSD1 demethylase in stemness and cancer transcription programs. *Biochim. Biophys. Acta* 1829: 981-986, 2013.
- Wang J, Lu F, Ren Q, Sun H, Xu Z, Lan R, Liu Y, Ward D, Quan J, Ye T and Zhang H: Novel histone demethylase LSD1 inhibitors selectively target cancer cells with pluripotent stem cell properties. *Cancer Res* 71: 7238-7249, 2011.
- Cai H, Xu J, Han Y, Lu Z, Han T, Ding Y and Ma L: Integrated miRNA-risk gene-pathway pair network analysis provides prognostic biomarkers for gastric cancer. *Onco Targets Ther* 9: 2975-2986, 2016.
- Gheybi MK, Farrokhi S, Ravanbod MR, Ostovar A, Mehrzad V and Nematollahi P: The correlation of CD19+CD24+CD38+B cells and other clinicopathological variables with the proportion of circulating tregs in breast cancer patients. *Breast Cancer* 24: 756-764, 2017.
- Pardo OE, Castelano L, Munro CE, Hu Y, Mauri F, Krell J, Lara R, Pinho FG, Choudhury T, Frampton AE, *et al*: miR-515-5p controls cancer cell migration through MARK4 regulation. *EMBO Rep* 17: 570-584, 2016.
- Marquez J, Kohli M, Arteta B, Chang S, Li WB, Goldblatt M and Vidal-Vanaclocha F: Identification of hepatic microvascular adhesion-related genes of human colon cancer cells using random homozygous gene perturbation. *Int J Cancer* 133: 2113-2122, 2013.
- Ranu RS and London IM: Regulation of protein synthesis in rabbit reticulocyte lysates: Additional initiation factor required for formation of ternary complex (eIF-2.GTP.Met-tRNA<sup>f</sup>) and demonstration of inhibitory effect of heme-regulated protein kinase. *Proc Natl Acad Sci USA* 76: 1079-1083, 1979.
- Hitchins MP and Burn J: Hitchins and John Burn. Alu in Lynch Syndrome: A Danger SINE? *Cancer Prev Res (Phila)* 4: 1527-1530, 2011.
- Al-Hajj M, Wicha MS, Benito-Hernandez A, Morrison SJ and Clarke MF: Prospective identification of tumorigenic breast cancer cells. *Proc Natl Acad Sci USA* 100: 3983-3988, 2003.
- Randle SJ and Laman H: F-box protein interactions with the hallmark pathways in cancer. *Semin Cancer Biol* 36: 3-17, 2016.
- Schmidt MO, Garman KA, Lee YG, Zuo C, Beck PJ, Tan M, Aguilar-Pimentel JA, Ollert M, Schmidt-Weber C, Fuchs H, *et al*: The role of fibroblast growth factor binding protein 1 in skin carcinogenesis and inflammation. *J Invest Dermatol* 138: 179-188, 2018.
- Porath B, Galnnullin VG, Cornec-Le Gall E, Dillinger EK, Heyer CM, Hopp K, Edwards ME, Madsen CD, Mauritz SR, Banks CJ, *et al*: Mutations in GANAB, Encoding the Glucosidase IIa subunit, cause autosomal-dominant polycystic kidney and liver disease. *Am J Hum Genet* 98: 1193-1207, 2016.
- Thakur A, Xu H, Wang Y, Bollig A, Biliran H and Liao JD: The role of X-linked genes in breast cancer. *Breast Cancer Res Treat* 93: 135-143, 2005.
- Zhouravleva G, Schepacev V, Petrova A, Tarasov O and Inge-Vechtomov S: Hypothesis: Evolution of translation termination factor eRF3: Is GSPT2 generated by retrotransposition of GSPT1's mRNA? *IUBMB Life* 58: 199-202, 2006.
- Tian XX, Rai D, Li J, Zou C, Bai Y, Wazer D, Band V and Gao Q: BRCA2 suppresses cell proliferation via stabilizing MAGE-D1. *Cancer Res* 65: 4747-4753, 2005.
- Derambure C, Dzanque-Tchoupou G, Berard C, Vergne N, Hiron M, D'Agostino MA, Musette P, Vittecoq O and Lequerré T: Pre-silencing of genes involved in the electron transport chain (ETC) pathway is associated with responsiveness to abatacept in rheumatoid arthritis. *Arthritis Res Ther* 19: 109, 2017.
- Magnani L, Patten DK, Nguyen VT, Hong SP, Steel JH, Patel N, Lombardo Y, Faronato M, Gomes AR, Woodley L, *et al*: The pioneer factor PBX1 is a novel driver of metastatic progression in ERα-positive breast cancer. *Oncotarget* 6: 21878-21891, 2015.
- Tian J, Keller MP, Oler AT, Rabaglia ME, Schueler KL, Stapleton DS, Broman AT, Zhao W, Kendzierski C, Yandell BS, *et al*: Identification of the bile acid transporter Slc10a6 as a candidate gene that broadly affects gene expression in mouse pancreatic islets. *Genetics* 201: 1253-1262, 2015.
- Urano T, Saito T, Tsukui T, Fujita M, Hosoi T, Muramatsu M, Ouchi Y and Inoue S: Efp targets 14-3-3 sigma for proteolysis and promotes breast tumour growth. *Nature* 417: 871-875, 2002.
- Simooka H, Oyama T, Sano T, Horiguchi J and Nakajima T: Immunohistochemical analysis of 14-3-3 sigma and related proteins in hyperplastic and neoplastic breast lesions, with particular reference to early carcinogenesis. *Pathol Int* 54: 595-602, 2004.
- Prevot PP, Augereau C, Simion A, Van den Steen G, Dauguet N, Lemaigre FP and Jacquemin P: Let-7b and miR-495 stimulate differentiation and prevent metaplasia of pancreatic acinar cells by repressing HNF6. *Gastroenterology* 145: 668-678.e3, 2013.
- Hock AK, Vigneron AM and Vowsden KH: Ubiquitin-specific peptidase 42 (USP42) functions to deubiquitylate histones and regulate transcriptional activity. *J Biol Chem* 289: 34862-34870, 2014.
- Hock AK, Vigneron AM, Carter S, Ludwig RL and Vowsden KH: Regulation of p53 stability and function by the deubiquitinating enzyme USP42. *EMBO J* 30: 4921-4930, 2011.
- Jen J and Wang YC: Zinc finger proteins in cancer progression. *J Biomed Sci* 23: 53, 2016.
- Echeverría PC, Briand PA and Picard D: A remodeled Hsp90 molecular chaperone ensemble with the novel cochaperone Aarsd1 is required for muscle differentiation. *Mol Cell Biol* 36: 1310-1321, 2016.
- Ogawa Y, Tsuda H, Hai E, Tsuji N, Yamagata S, Tokunaga S, Nakazawa K, Tamamori Y, Ogawa M, Shimizu S, *et al*: Clinical role of ABCF2 expression in breast cancer. *Anticancer Res* 26: 1809-1814, 2006.
- Dema A, Schroter MF, Perets E, Skrobilin P, Moutty MC, Deák VA, Birchmeier W and Klussmann E: The A-Kinase Anchoring Protein (AKAP) Glycogen Synthase Kinase 3β Interaction Protein (GSKIP) Regulates β-Catenin through Its Interactions with Both Protein Kinase A (PKA) and GSK3β. *J Biol Chem* 291: 19618-19630, 2016.
- Sedova L, Pravenec M, Krenova D, Kazdová L, Zídek V, Krupková M, Liška F, Křen V and Šeda O: Isolation of a genomic region affecting most components of metabolic syndrome in a chromosome-16 congenic rat model. *PLoS One* 11: e0152708, 2016.
- Chai F, Liang Y, Zhang F, Wang M, Zhong L and Jiang J: Systematically identify key genes in inflammatory and non-inflammatory breast cancer. *Gene* 575: 600-614, 2016.
- Li RA, Traver D, Matthes T and Bertrand JY: Ndr1b and fam49ab modulate the PTEN pathway to control T-cell lymphopoiesis in the zebrafish. *Blood* 128: 3052-3060, 2016.
- Davis NM, Sokolosky M, Stadelman K, Abrams SL, Libra M, Candido S, Nicoletti F, Polesel J, Maestro R, D'Assoro A, *et al*: Deregulation of the EGFR/PI3K/PTEN/Akt/mTORC1 pathway in breast cancer: Possibilities for therapeutic intervention. *Oncotarget* 5: 4603-4650, 2014.
- Schmid M, Hunold K, Weber-Steffens D and Männel DN: Ficolin-B marks apoptotic and necrotic cells. *Immunobiology* 217: 610-615, 2012.
- Guo T, Chen T, Gu C, Li B and Xu C: Genetic and molecular analyses reveal G6PC as a key component connecting glucose metabolism and cell cycle control in ovarian cancer. *Tumour Biol* 36: 7649-7658, 2015.
- Wiley SZ, Sriram K, Liang W, Chang SE, French R, McCann T, Sicklick J, Nishihara H, Lowy AM and Insel PA: GPR68, a proton-sensing GPCR, mediates interaction of cancer associated fibroblasts and cancer cells. *FASEB J* 32: 1170-1183, 2017.
- Mohelnikova-Duchonova B, Brynychova V, Hlavac V, Kocik M, Oliverius M, Hlavsa J, Honsova E, Mazanec J, Kala Z, Melichar B and Soucek P: The association between the expression of solute carrier transporters and the prognosis of pancreatic cancer. *Cancer Chemother Pharmacol* 72: 669-682, 2013.
- McAvoy S, Ganapathiraju SC, Ducharme-Smith AL, Pritchett JR, Kosari F, Perez DS, Zhu Y, James CD and Smith DI: Non-random inactivation of large common fragile site genes in different cancers. *Cytogenet Genome Res* 118: 260-269, 2007.
- Sancak Y, Bar-Peled L, Zoncu R, Markhard AL, Nada S and Sabatini DM: Ragulator-Rag complex targets mTORC1 to the lysosomal surface and is necessary for its activation by amino acids. *Cell* 141: 290-303, 2010.
- Okosun J, Wolfson RL, Wang J, Araf S, Wilkins L, Castellano BM, Escudero-Ibarz L, Al Seraihi AF, Richter J, Bernhart SH, *et al*: Recurrent mTORC1-activating RRAGC mutations in follicular lymphoma. *Nat Genet* 48: 183-188, 2016.
- Li X, Yang Q, Yu H, Wu L, Zhao Y, Zhang C, Yue X, Liu Z, Wu H, Haffty BG, *et al*: LIF promotes tumorigenesis and metastasis of breast cancer through the AKT-mTOR pathway. *Oncotarget* 5: 788-801, 2014.
- Lamouille S, Connolly E, Smyth JW, Akhurst RJ and Derynck R: TGF-β-induced activation of mTOR complex 2 drives epithelial-mesenchymal transition and cell invasion. *J Cell Sci* 25: 1259-1273, 2012.
